# Supplementary material for: Selective copper(ii)-mediated oxidative coupling of a nucleophilic reagent to the para-methyl group of 2,4,6-trimethylphenol
Source: Royal Society of Chemistry journal article supplement (doi:10.1039/b507199b), 2005-01-01
Supplement: b507199b.pdf [file b507199b.pdf]

Selective copper(II)-mediated oxidative coupling of a nucleophilic reagent to the *para*-methyl group of 2,4,6-trimethylphenol

Christophe Boldron, Seniz Özalp-Yaman, Patrick Gamez, Duncan M. Tooke, Anthony L. Spek and Jan Reedijk\*

Leiden Institute of Chemistry, Gorlaeus Laboratories, Leiden University, P.O. Box 9502, 2300 RA Leiden, The Netherlands. Fax: 31 715274671; Tel: 31 715274459; E-mail: reedijk@chem.leidenuniv.nl

I. UV-vis studies

Sequential addition of Copper(II) chloride to a solution of 2,4,6-trimethylphenol/NaOMe.

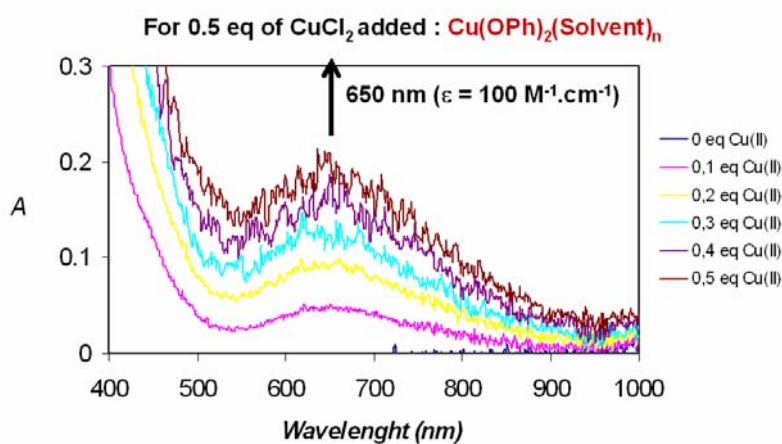

Figure S1

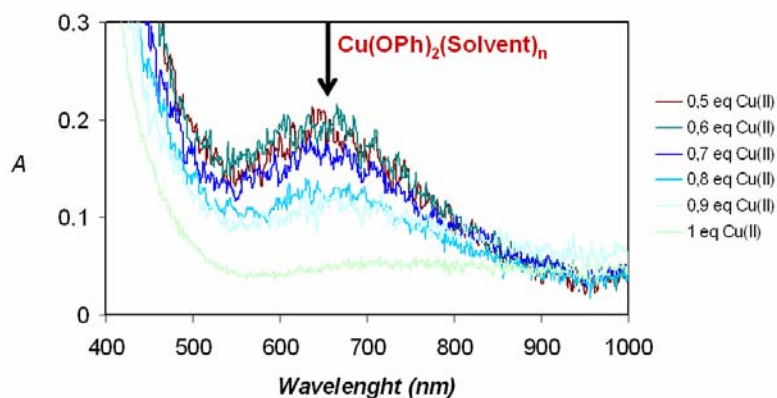

Figure S2

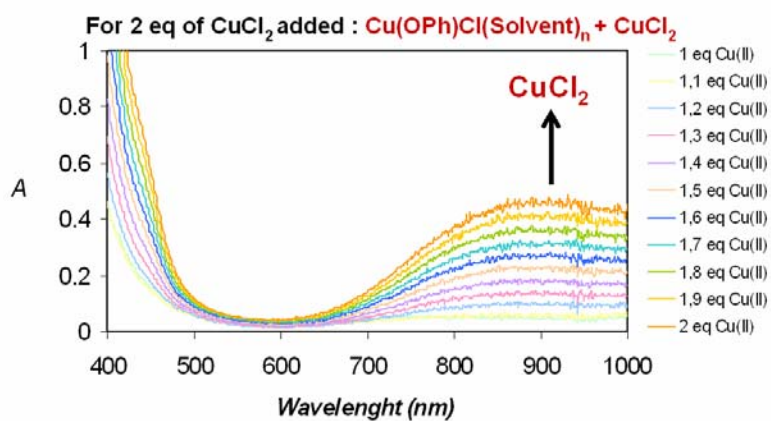

Figure S3

*Sequential addition of sodium methoxide to a solution of 2,4,6-trimethylphenol/ $\text{NaOMe}/(\text{CuCl}_2)_2$ .*

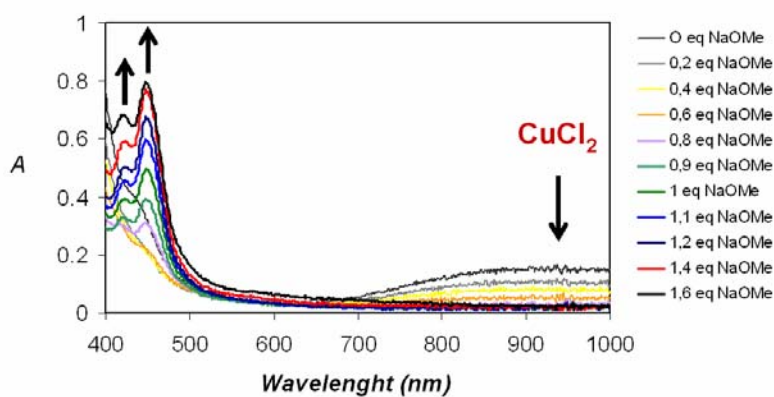

Figure S4

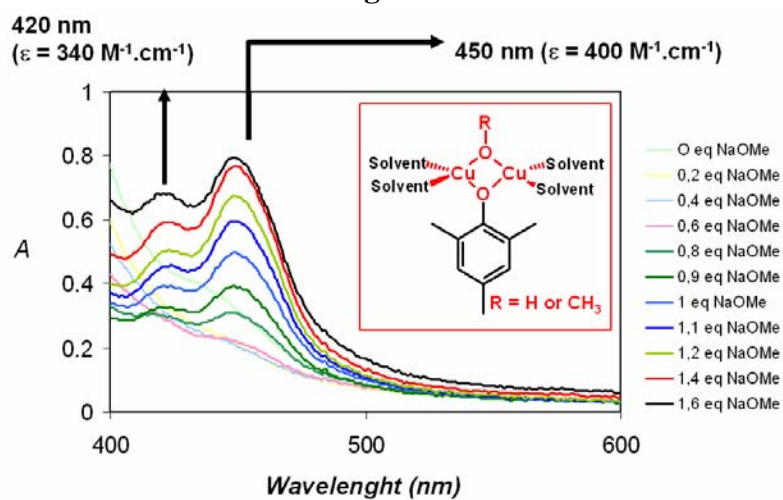

Figure S5

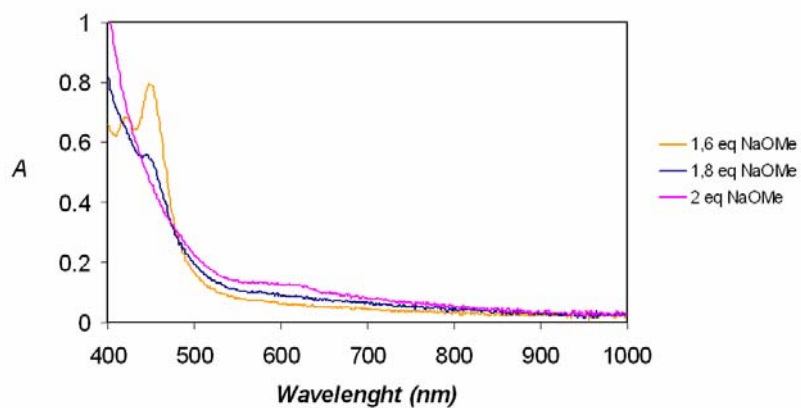

**Figure S6**

*Sequential addition of sodium methoxide to a solution of 2,4,6-trimethylphenol/ $\text{NaOMe}/(\text{CuCl}_2)_2/(\text{bipyridine})_2$ .*

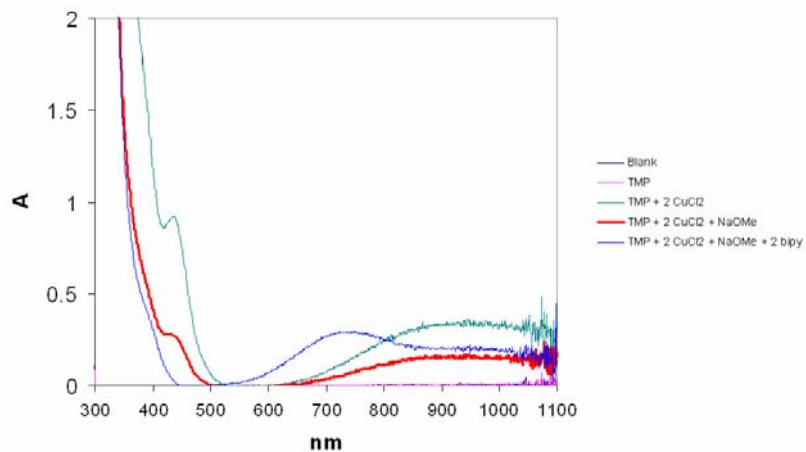

**Figure S7**

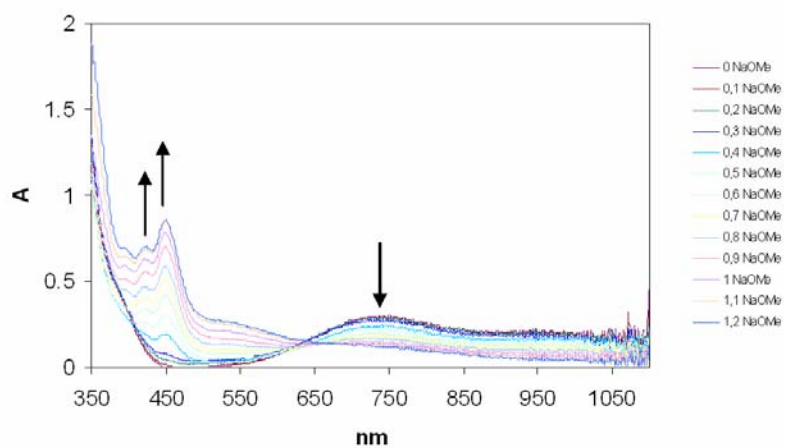

**Figure S8**

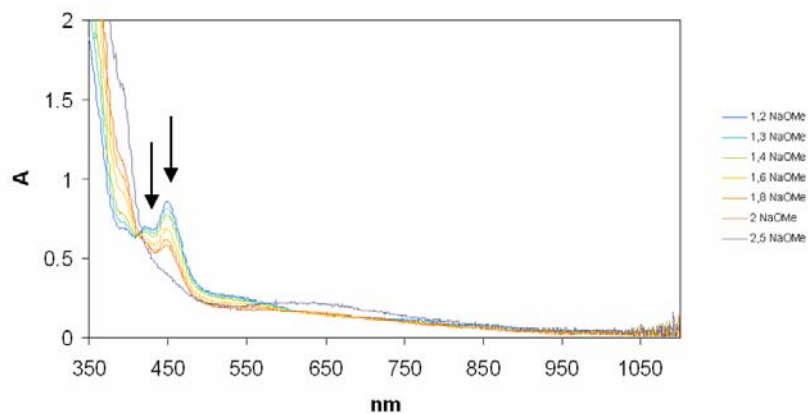

Figure S9

## II. EPR studies

*Addition of various amounts of sodium methoxide to a solution of 2,4,6-trimethylphenol/NaOMe/(CuCl<sub>2</sub>)<sub>2</sub>*

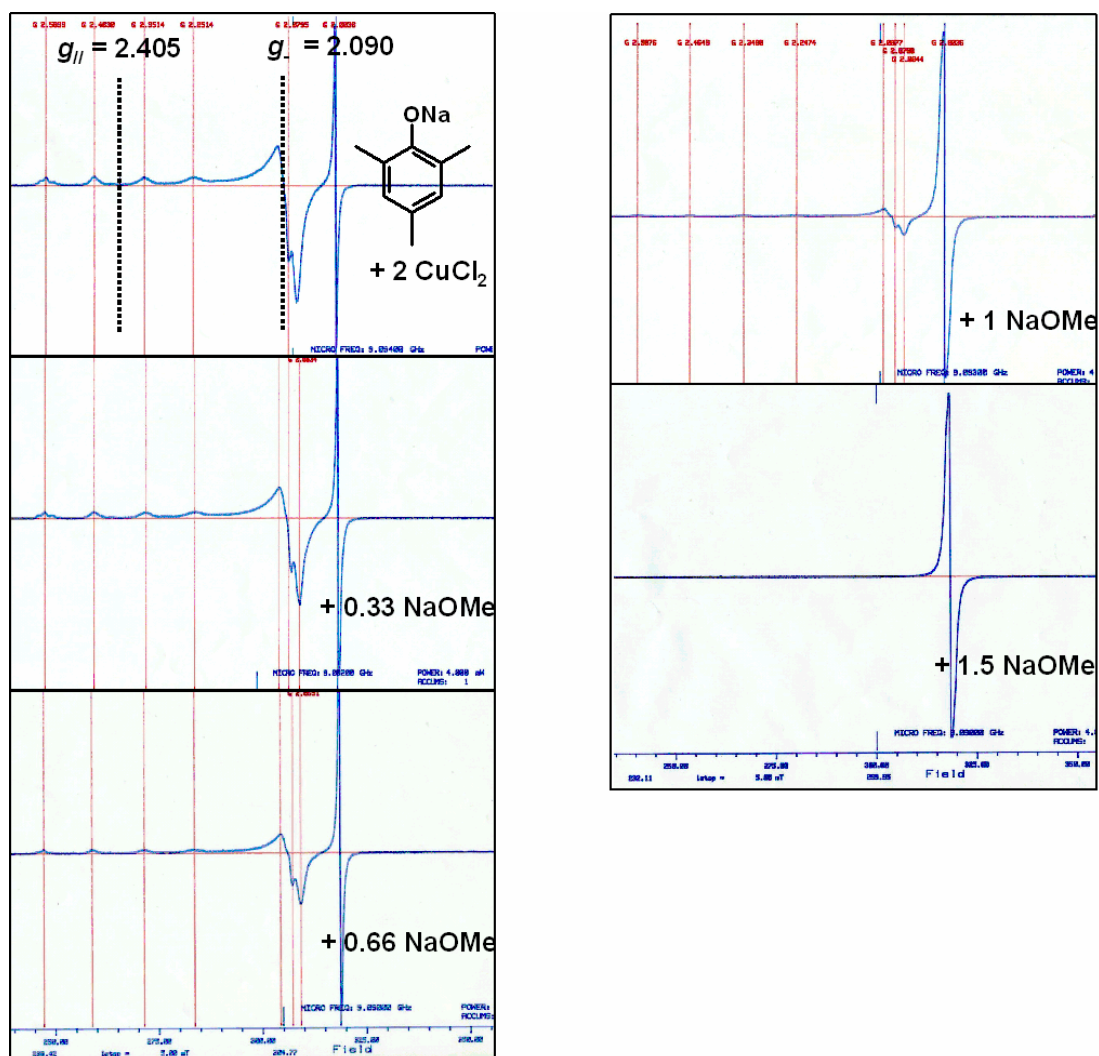

Figure S10

### III. Cyclovoltammetry

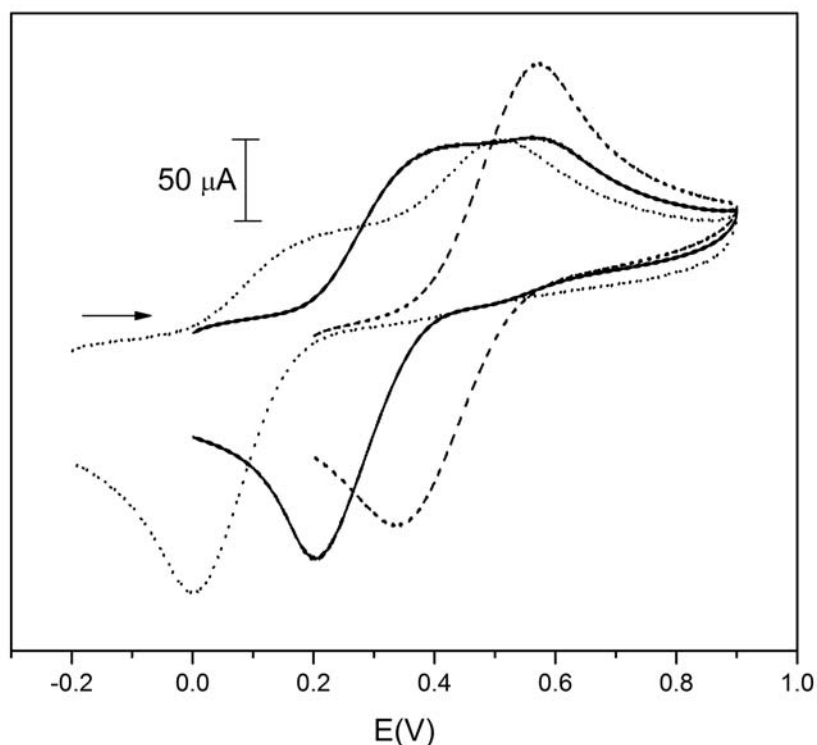

**Figure S11:** Cyclic voltammogram of 0.004 M  $\text{CuCl}_2^{\text{II/I}}$  (---),  $[\text{CuCl}_2(\text{neocuproine})_2]^{\text{II/I}}$  (—),  $[\text{CuCl}_2(\text{bipyridine})_2]^{\text{II/I}}$  (···) in DMF at room temperature vs.  $\text{Ag}/\text{Ag}^+$ .

The electrochemical behavior of the complexes was investigated by cyclic voltammetry (CV), using an Autolab PGSTAT10 potentiostat in DMF- $[\text{n}-(\text{C}_4\text{H}_9)_4\text{N}]\text{PF}_6$  solvent-electrolyte couple versus  $\text{Ag}/\text{Ag}^+$  reference electrode under a nitrogen gas atmosphere at room temperature. A glassy carbon working electrode and a platinum plate ( $0.7 \text{ cm}^2$ ) counter electrode were used for CV measurements. The cyclic voltammetric experiments were performed after mixing one equivalent of copper(II) chloride (0.004 M solution of in DMF) with one equivalent of the ligand (0.004 M solution in DMF). The voltage scan rate during the CV measurements was 100 mV/s.

| Compound     | $E_a$ (V) |
|--------------|-----------|
| Cu(II)/Cu(I) | 0.57      |
| Cu(neo)      | 0.37      |
| Cu(bipy)     | 0.18      |

N.B.: The voltammograms for Cu(neo) and Cu(bipy) show the presence of free  $\text{CuCl}_2$ , suggesting the formation of a  $[\text{CuCl}_2(\text{ligand})_2]$  complex in solution.

# IV. NMR spectra of the compounds VIc-h

4-(2-hydroxy-ethoxymethyl)-2,6-dimethylphenol (VIc)

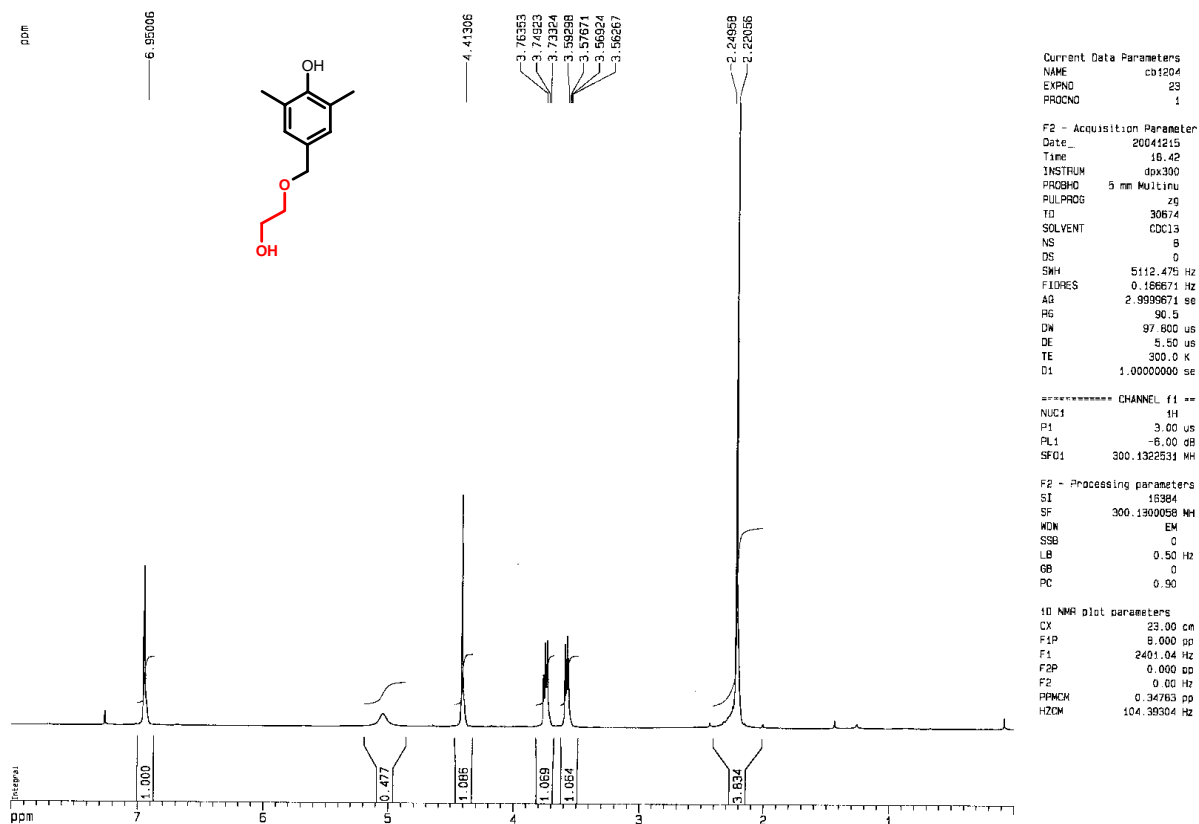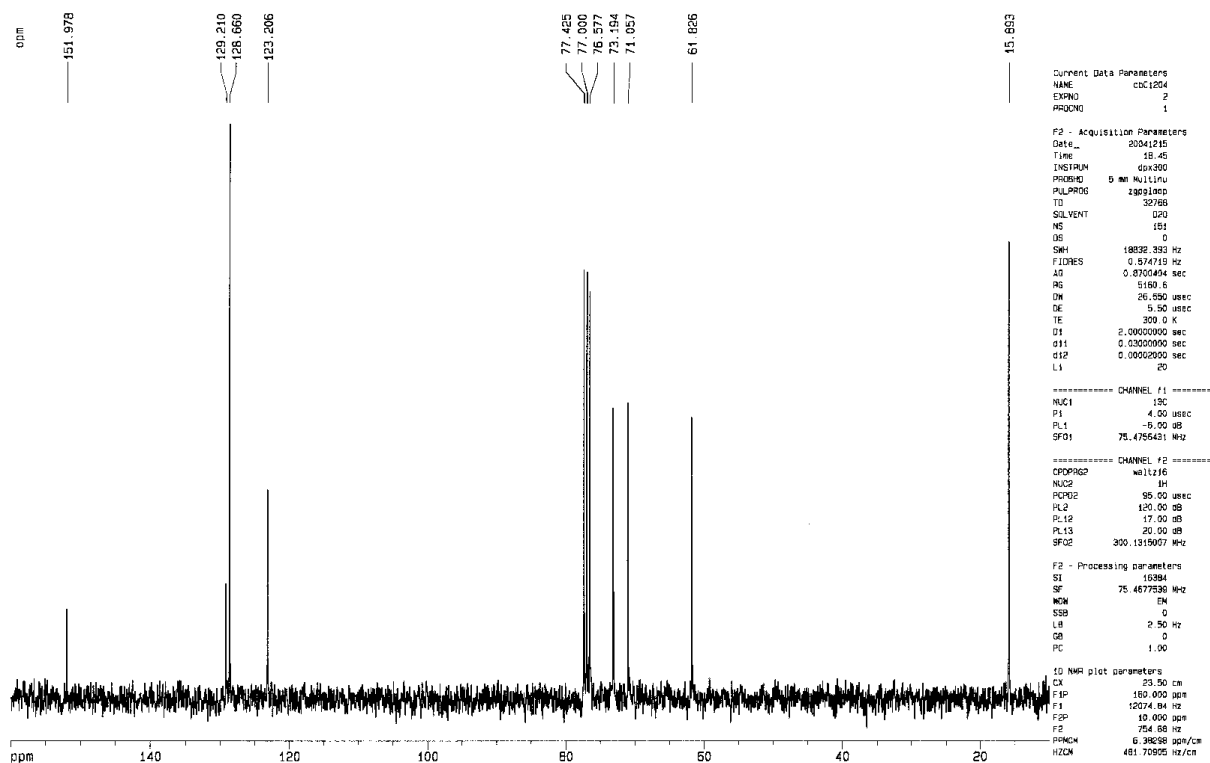

1,2-bis(4-oxymethyl-2,6-dimethylphenol)ethane (VIId)

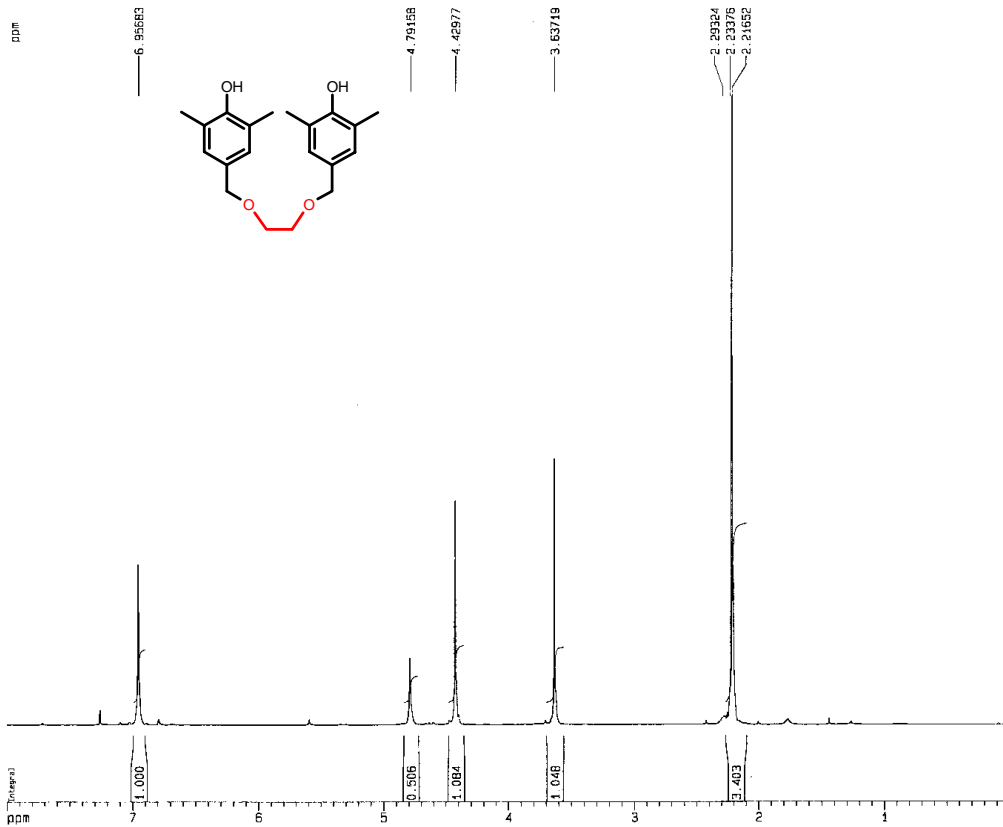

Current Data Parameters  
 NAME cp1204  
 EXPNO 22  
 PROCNO 1

F2 - Acquisition Parameter  
 Date\_ 20041215  
 Time 18.36  
 INSTRUM INDX300  
 PROBNM 5 mm Multis  
 PULPROG zg  
 TD 30574  
 SOLVENT CDCl3  
 NS 8  
 DS 0  
 SMH 5112.475 Hz  
 FIDRES 0.166871 Hz  
 AQ 2.999871 sec  
 RG 90.5  
 DW 97.800 us  
 DE 5.50 us  
 TE 300.0 K  
 D1 1.00000000 sec

----- CHANNEL f1 -----  
 NUC1 1H  
 P1 3.00 us  
 PL1 6.00 dB  
 SFO1 300.1322631 MHz

F2 - Processing parameters  
 SI 16384  
 SF 300.1300056 MHz  
 NDM EM  
 SSB 0  
 LB 0.50 Hz  
 GB 0  
 PC 0.50

1D NMR plot parameters  
 CX 23.00 cm  
 F1P 8.000 pp  
 F1 2401.04 Hz  
 F2P 0.000 pp  
 F2 0.00 Hz  
 FRMCH 0.34783 pp  
 HZCM 104.98304 Hz

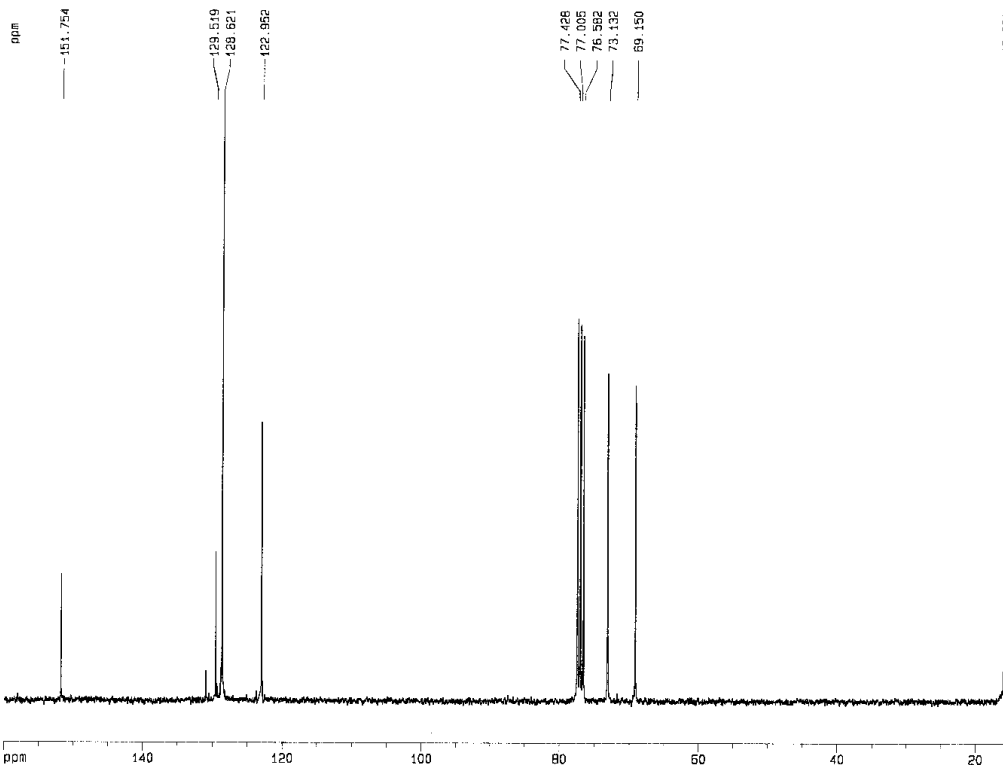

Current Data Parameters  
 NAME cp1204  
 EXPNO 3  
 PROCNO 1

F2 - Acquisition Parameters  
 Date\_ 20041215  
 Time 18.56  
 INSTRUM INDX300  
 PROBNM 5 mm Multis  
 PULPROG zgpg30mp  
 TD 32768  
 SOLVENT CDCl3  
 NS 5163  
 DS 0  
 SMH 18892.393 Hz  
 FIDRES 0.514719 Hz  
 AQ 0.8720424 sec  
 RG 5180.6  
 DW 26.950 usec  
 DE 5.50 usec  
 TE 300.0 K  
 D1 2.00000000 sec  
 d11 0.03000000 sec  
 d12 0.00000000 sec  
 LI 20

----- CHANNEL f1 -----  
 NUC1 13C  
 P1 4.00 usec  
 PL1 6.00 dB  
 SFO1 75.4755431 MHz

----- CHANNEL f2 -----  
 PULPROG2 waltz16  
 NUC2 1H  
 PCPDR2 95.00 usec  
 PL2 120.00 dB  
 PL12 17.00 dB  
 PL13 22.00 dB  
 SFO2 300.1315007 MHz

F2 - Processing parameters  
 SI 16384  
 SF 75.4577539 MHz  
 NDM EM  
 SSB 0  
 LB 2.50 Hz  
 GB 0  
 PC 1.00

1D NMR plot parameters  
 CX 23.50 cm  
 F1P 160.000 ppm  
 F1 12074.84 Hz  
 F2P 10.000 ppm  
 F2 754.66 Hz  
 FRMCH 0.30288 ppm/cm  
 HZCM 481.70590 Hz/cm

Bis-(4-hydroxy-3,5-dimethylbenzyl)-di-pyridin-2-yl-ammonium chloride (VIe)

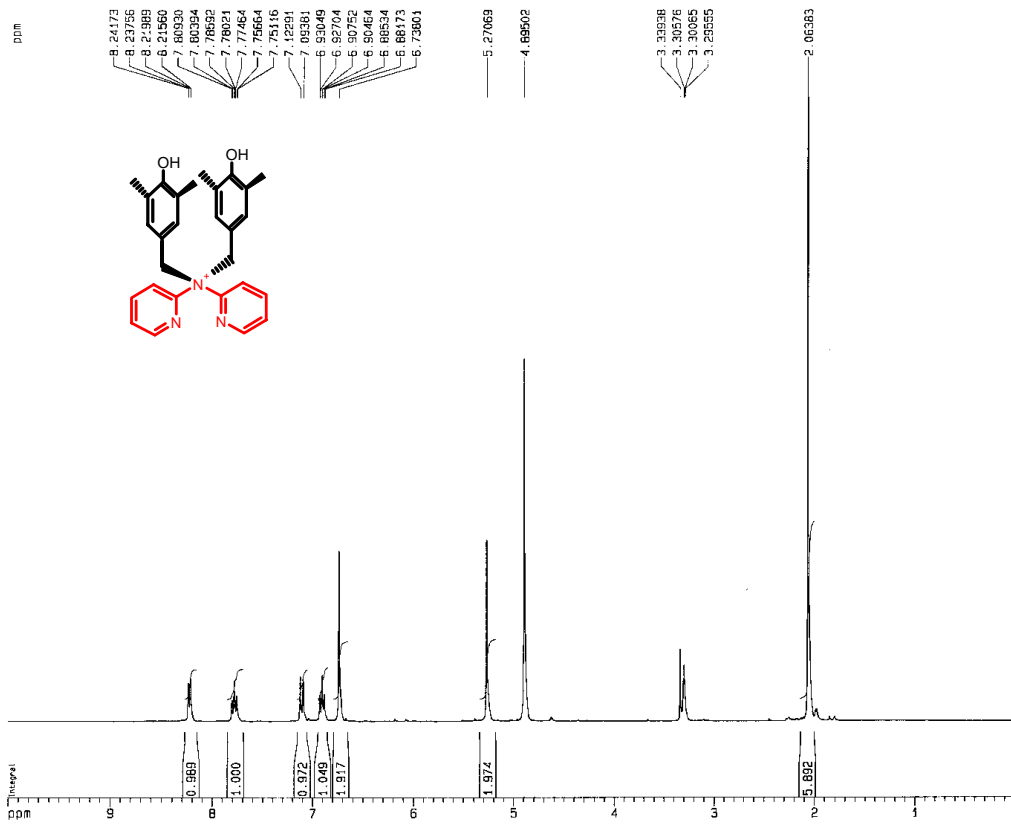

Current Data Parameters  
 NAME cbb11104  
 EXPNO 20  
 PROCNO 1

F2 - Acquisition Parameter  
 Date\_ 20041127  
 Time 19.54  
 INSTRUM oox300  
 PROBHD 5 mm Multinu  
 PULPROG zg  
 TD 30674  
 SOLVENT Meod  
 NS 48  
 DS 0  
 SWH 5112.475 Hz  
 FIDRES 0.156671 Hz  
 AQ 2.9595671 se  
 RG 128  
 DW 97.800 us  
 DE 5.50 us  
 TE 300.0 K  
 D1 1.00000000 se

----- CHANNEL f1 -----  
 NUC1 1H  
 P1 3.00 us  
 PL1 -6.00 dB  
 SFO1 300.1322531 MHz

F2 - Processing parameters  
 SI 16384  
 SF 300.1300073 MHz  
 WCN EN  
 SSB 0  
 LB 0.50 Hz  
 GB 0  
 PC 0.90

1D NMR plot parameters  
 CX 23.00 cm  
 F1P 10.000 ppm  
 F1 3001.30 MHz  
 F2P 0.000 ppm  
 F2 0.00 Hz  
 FPMCM 0.43478 ppm  
 HZCM 130.49130 Hz

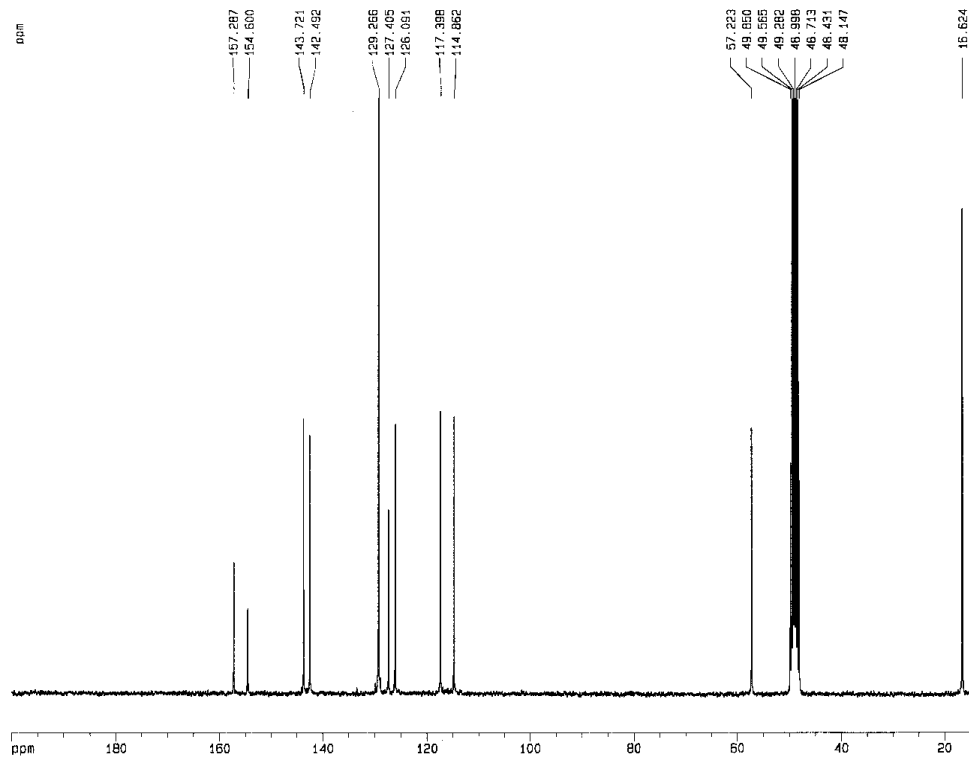

Current Data Parameters  
 NAME cbc1104  
 EXPNO 5  
 PROCNO 1

F2 - Acquisition Parameters  
 Date\_ 20041127  
 Time 20.04  
 INSTRUM oox300  
 PROBHD 5 mm Multinu  
 PULPROG zgpg30p0  
 TD 30768  
 SOLVENT D2O  
 NS 18956  
 DS 0  
 SWH 18822.933 Hz  
 FIDRES 0.574719 Hz  
 AQ 0.8700404 sec  
 RG 5160.5  
 DW 26.550 usec  
 DE 9.50 usec  
 TE 300.0 K  
 D1 2.00000000 sec  
 d11 0.03000000 sec  
 d12 0.00002000 sec  
 L1 20

----- CHANNEL f1 -----  
 NUC1 13C  
 P1 4.00 usec  
 PL1 -5.00 dB  
 SFO1 75.4756431 MHz

----- CHANNEL f2 -----  
 CPDPRG2 waltz16  
 NUC2 1H  
 FREQ2 505.00 usec  
 PL2 120.00 dB  
 PL12 17.00 dB  
 PL13 20.00 dB  
 SFO2 300.1316097 MHz

F2 - Processing parameters  
 SI 16384  
 SF 75.4776440 MHz  
 WCN EN  
 SSB 0  
 LB 2.50 Hz  
 GB 0  
 PC 1.00

1D NMR plot parameters  
 CX 23.50 cm  
 F1P 200.000 ppm  
 F1 15059.53 Hz  
 F2P 0.000 ppm  
 F2 0.00 Hz  
 FPMCM 8.51664 ppm/cm  
 HZCM 662.27783 Hz/cm



3-(4-hydroxy-3,5-dimethylbenzyl)pentane-2,4-dione (VI)

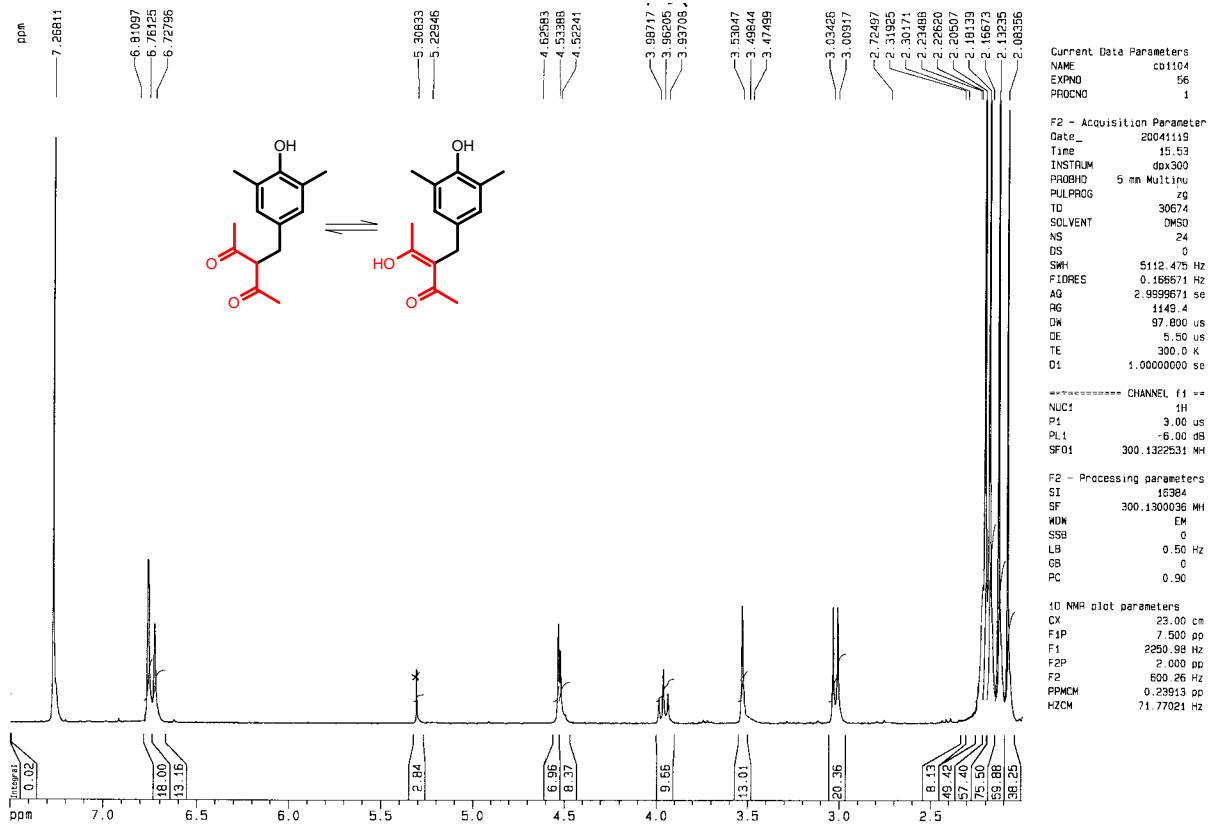

Current Data Parameters  
 NAME cb1104  
 EXPNO 56  
 PROCNO 1

F2 - Acquisition Parameter  
 Date\_ 20041119  
 Time 15.53  
 INSTRUM dox300  
 PROBHD 5 mm Multinu  
 PULPROG zg  
 TD 30674  
 SOLVENT DMSO  
 NS 24  
 DS 0  
 SWH 5112.475 Hz  
 FIDRES 0.166571 Hz  
 AQ 2.9599671 se  
 RG 1142.4  
 DM 97.800 us  
 DE 5.50 us  
 TE 300.0 K  
 D1 1.00000000 se

\*\*\*\*\* CHANNEL f1 \*\*\*\*  
 NUC1 1H  
 P1 3.00 us  
 PL1 -6.00 dB  
 SF01 300.1322531 MHz

F2 - Processing parameters  
 SI 16394  
 SF 300.1300036 MHz  
 MDW EM  
 SSB 0  
 LB 0.50 Hz  
 GB 0  
 PC 0.90

1D NMR plot parameters  
 CX 23.00 cm  
 FXP 7.500 dp  
 F1 2250.98 Hz  
 F2P 2.000 dp  
 F2 600.26 Hz  
 PPMCM 0.23913 dp  
 HZCM 71.77021 Hz

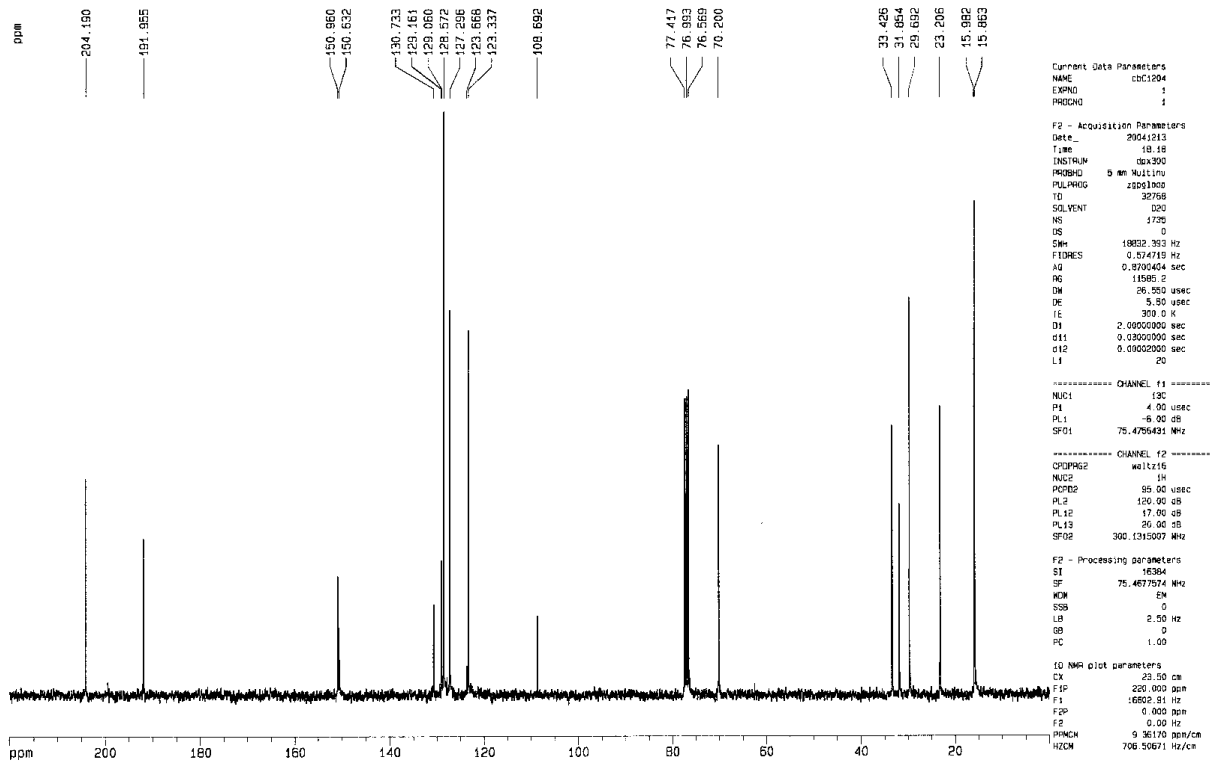

Current Data Parameters  
 NAME cb1204  
 EXPNO 1  
 PROCNO 1

F2 - Acquisition Parameters  
 Date\_ 20041213  
 Time 18.18  
 INSTRUM dox300  
 PROBHD 5 mm Multinu  
 PULPROG zgpg30  
 TD 32768  
 SOLVENT D2O  
 NS 1728  
 DS 0  
 SWH 18832.353 Hz  
 FIDRES 0.574719 Hz  
 AQ 0.370404 sec  
 RG 11589.2  
 DM 26.550 usec  
 DE 5.50 usec  
 TE 300.0 K  
 D1 2.0000000 sec  
 d11 0.0300000 sec  
 d12 0.0000000 sec  
 L1 20

\*\*\*\*\* CHANNEL f1 \*\*\*\*  
 NUC1 13C  
 P1 4.00 usec  
 PL1 -6.00 dB  
 SF01 75.4756431 MHz

\*\*\*\*\* CHANNEL f2 \*\*\*\*  
 QPCPRG2 waltz16  
 NUC2 1H  
 P2P2 85.00 usec  
 PL2 120.00 dB  
 PL12 17.00 dB  
 PL13 25.00 dB  
 SF02 300.1315007 MHz

F2 - Processing parameters  
 SI 15384  
 SF 75.4677574 MHz  
 MDW EM  
 SSB 0  
 LB 2.50 Hz  
 GB 0  
 PC 1.00

1D NMR plot parameters  
 CX 23.50 cm  
 F1P 220.000 ppm  
 F1 16502.91 Hz  
 F2P 0.000 ppm  
 F2 0.00 Hz  
 PPMCM 9.36170 ppm/cm  
 HZCM 706.57671 Hz/cm

2-(4-hydroxy-3,5-dimethylbenzyl)isoindole-1,3-dione (**VIg**)

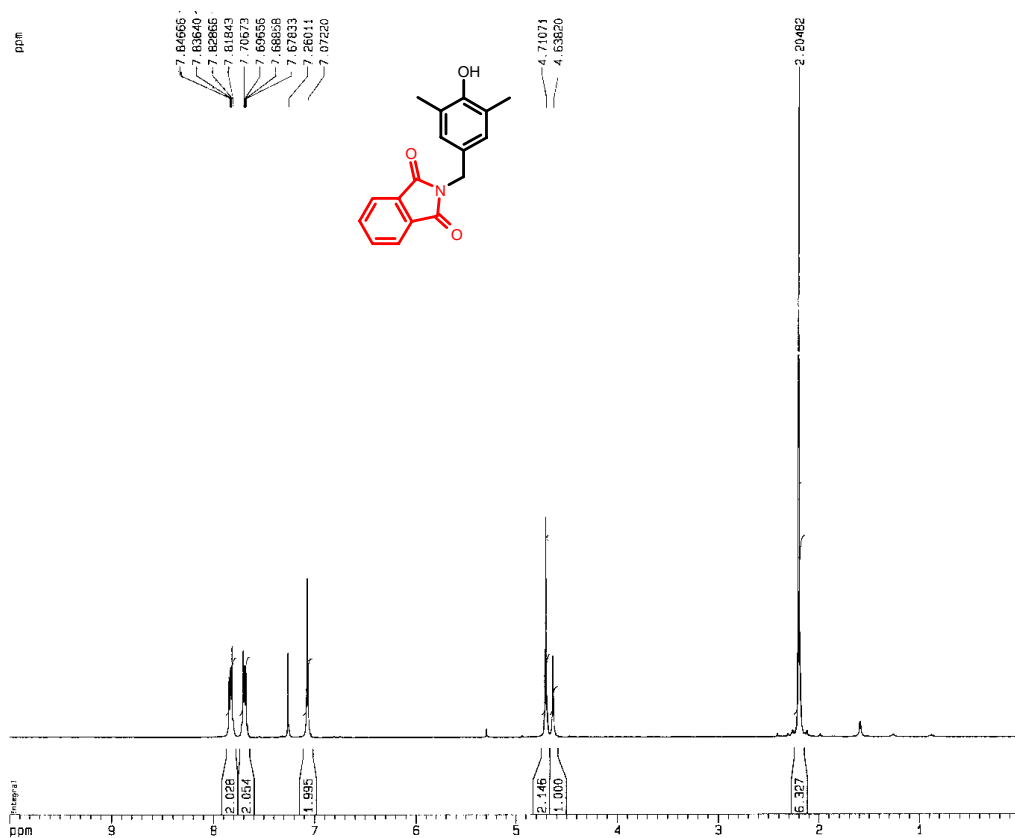

Current Data Parameters  
 NAME cbb1104  
 EXPNO 1  
 PROCNO 1

F2 - Acquisition Parameters  
 Date\_ 20041125  
 Time 18.26  
 INSTRUM dpx300  
 PROBPID 5 mm Multinu  
 PULPROG zg  
 TD 3274  
 SOLVENT CDCl3  
 NS 39  
 DS 0  
 SWH 5112.475 Hz  
 FIDRES 0.166671 Hz  
 AQ 2.9999671 se  
 RG 456.1  
 DW 97.800 us  
 DE 5.50 us  
 TE 300.0 K  
 D1 1.0000000 se

===== CHANNEL f1 ==  
 NUC1 1H  
 P1 3.00 us  
 PL1 -6.00 dB  
 SF01 300.1322531 MHz

F2 - Processing parameters  
 SI 16384  
 SF 300.1300058 MHz  
 WDN EM  
 SSB 0  
 LB 0.50 Hz  
 GB 0  
 PC 0.90

1D NMR plot parameters  
 CX 23.00 cm  
 F1P 10.000 pp  
 F1 3001.30 Hz  
 F2P 0.000 pp  
 F2 0.00 Hz  
 PRMCM 0.43478 pp  
 HZCM 130.45130 Hz

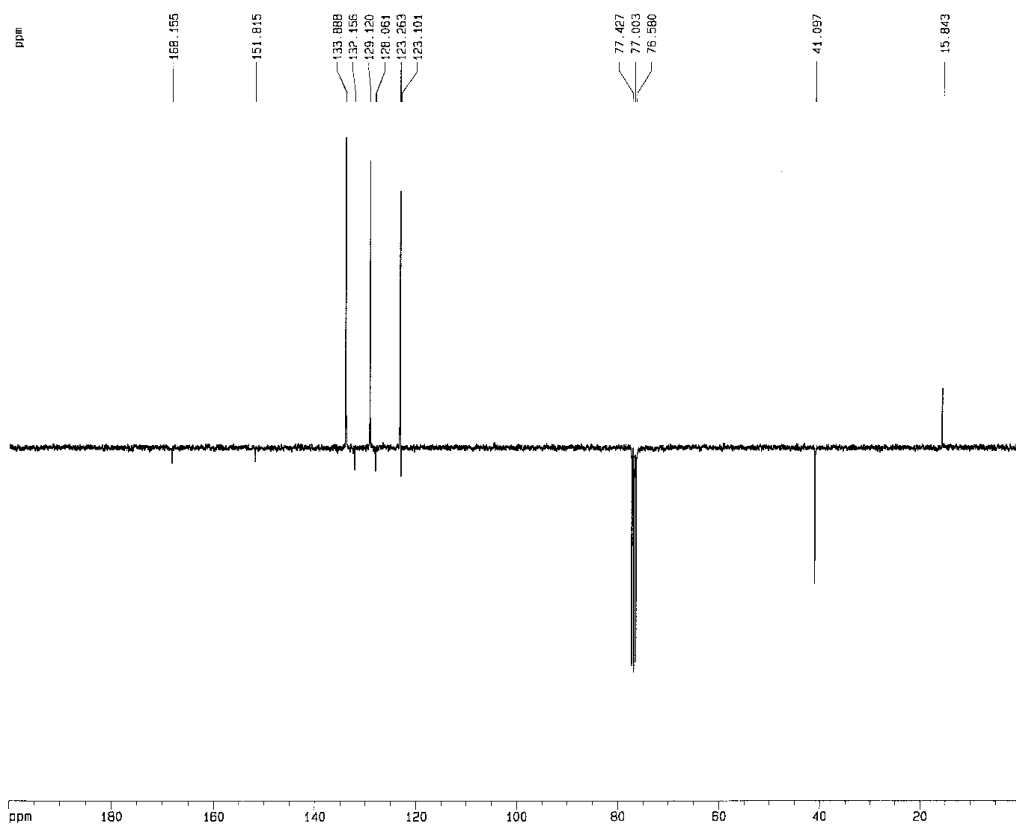

Current Data Parameters  
 NAME cbc1104  
 EXPNO 3  
 PROCNO 1

F2 - Acquisition Parameters  
 Date\_ 20041125  
 Time 18.30  
 INSTRUM dpx300  
 PROBPID 5 mm Multinu  
 PULPROG jmod1obp  
 TD 32768  
 SOLVENT CDCl3  
 NS 1658  
 DS 0  
 SWH 18832.383 Hz  
 FIDRES 0.574719 Hz  
 AQ 0.6700404 sec  
 RG 5792.5  
 DW 25.550 usec  
 DE 5.50 usec  
 TE 300.0 K  
 CMT2 160.000000  
 CMT11 1.000000  
 D1 2.0000000 sec  
 D13 0.0000300 sec  
 d20 0.00625000 sec  
 L1 20

===== CHANNEL f1 =====  
 NUC1 13C  
 P1 8.50 usec  
 p2 17.60 usec  
 PL1 -6.00 dB  
 SF01 75.4756431 MHz

===== CHANNEL f2 =====  
 CPDPRG2 waltz16  
 NUC2 1H  
 PCPD2 95.00 usec  
 PL2 180.00 dB  
 PL12 17.00 dB  
 SF02 300.1315007 MHz

F2 - Processing parameters  
 SI 16384  
 SF 75.4577516 MHz  
 WDN EM  
 SSB 0  
 LB 2.50 Hz  
 GB 0  
 PC 1.00

1D NMR plot parameters  
 CX 23.00 cm  
 F1P 200.000 ppm  
 F1 15093.55 Hz  
 F2P 0.000 ppm  
 F2 0.00 Hz  
 PRMCM 8.68955 ppm/c  
 HZCM 858.24133 Hz/c

4-(aminomethyl)-2,6-dimethylphenol (VIIh)

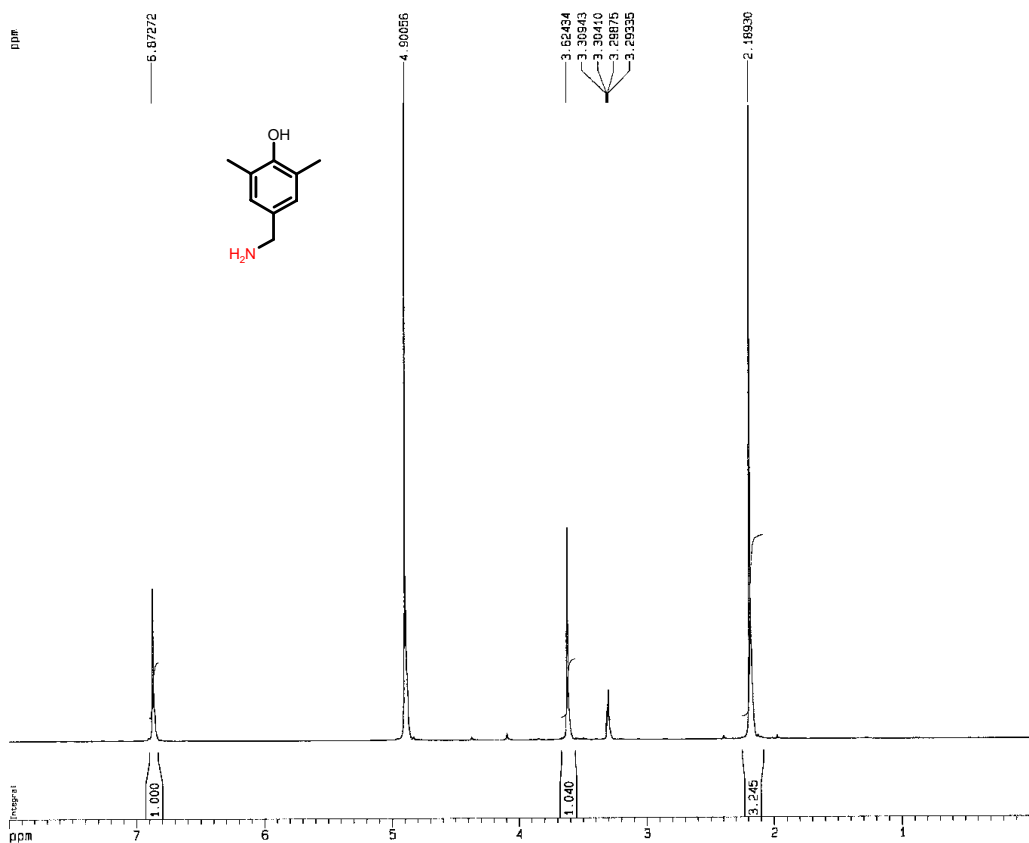

```

Current Data Parameters
NAME          coc1204
EXPNO        24
PROCNO       1

F2 - Acquisition Parameters
Date_        20041216
Time         16.45
INSTRUM      dox300
PROBHD       5 mm Multinu
PULPROG      zg
TD            30674
SOLVENT      MeOH
NS            8
DS            0
SWH           5112.475 Hz
FIDRES       0.166671 Hz
AQ            2.9999671 se
RG            143.7
DW            97.800 us
DE            5.50 us
TE            300.0 K
D1            1.00000000 se

----- CHANNEL f1 -----
NUC1          1H
P1            3.00 us
PL1           -6.00 dB
SFO1         300.1322531 MHz

F2 - Processing parameters
SI            16384
SF            300.1300054 MHz
WDW           EM
SSB           0
LB            0.50 Hz
GB            0
PC            0.90

1D NMR plot parameters
CX            23.00 cm
F1P           8.000 pc
F1            2401.04 Hz
F2P           0.000 pc
F2            9.00 Hz
P1MCM        0.34783 pc
+HZCM        104.39304 Hz
    
```

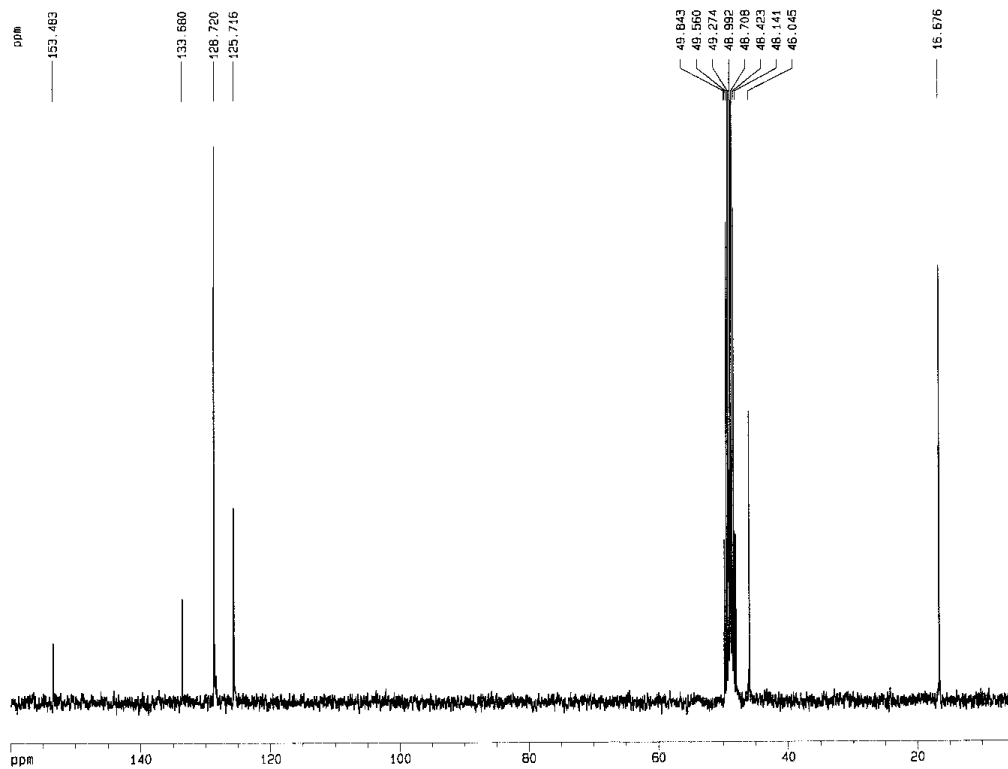

```

Current Data Parameters
NAME          coc1204
EXPNO        4
PROCNO       1

F2 - Acquisition Parameters
Date_        20041216
Time         19.52
INSTRUM      opx500
PROBHD       5 mm Multinu
PULPROG      zgpg10mg
TD            32768
SOLVENT      D2O
NS            880
DS            0
SWH           19632.393 Hz
FIDRES       0.574719 Hz
AQ            0.8706404 sec
RG            5160.5
DW            26.566 usec
DE            5.50 usec
TE            300.0 K
D1            2.00000000 sec
d11           0.03000000 sec
d12           0.00002000 sec
L1            20

----- CHANNEL f1 -----
NUC1          13C
P1            4.00 usec
PL1           -6.00 dB
SFO1         75.4756431 MHz

----- CHANNEL f2 -----
NAME         w11216
NUC2          1H
PULPROG      zgpg2
TD            95.00 usec
RG2           120.00 dB
PL2           17.00 dB
PL13          20.00 dB
SFO2         300.1315007 MHz

F2 - Processing parameters
SI            16384
SF            75.4676440 MHz
WDW           EM
SSB           0
LB            2.50 Hz
GB            0
PC            1.00

1D NMR plot parameters
CX            23.50 cm
F1P           160.000 ppm
F1            12074.82 Hz
F2P           0.000 ppm
F2            6.90 Hz
P1MCM        6.80951 cps/cm
+HZCM        513.82227 Hz/cm
    
```
